# Supplementary material for: Metabolomics reveals novel blood plasma biomarkers associated to the BRCA1-mutated phenotype of human breast cancer
Source: PubMed Central journal article supplement (PMC5736621; doi:10.1038/s41598-017-17897-8), 2017-12-19
Supplement: 41598_2017_17897_MOESM1_ESM.pdf [file 41598_2017_17897_MOESM1_ESM.pdf]

**Metabolomics reveals novel blood plasma biomarkers associated to the BRCA1-mutated phenotype of human breast cancer**

Barbara Roig<sup>1+</sup>, Marta Rodríguez-Balada<sup>1+</sup>, Sara Samino<sup>2,3</sup>, Eric W.-F. Lam<sup>4</sup>, Sandra Guaita-Esteruelas<sup>1</sup>, Ana R. Gomes<sup>4</sup>, Xavier Correig<sup>2,3</sup>, Joan Borràs<sup>1</sup>, Oscar Yanes<sup>2,3</sup>, Josep Gumà<sup>1\*</sup>

**Supplementary Table 1. BRCA1 and BRCA2 promoter hypermethylation percentages of the breast cancer cell lines analysed by methylation MS-MILPA**

| Breast cancer cell line | ME001-C2 assay |       | ME002-C1 assay |       | ME053-X1 assay |         |         |         |         |         |         |    |
|-------------------------|----------------|-------|----------------|-------|----------------|---------|---------|---------|---------|---------|---------|----|
|                         | BRCA1          | BRCA2 | BRCA1          | BRCA2 | BRCA1.1        | BRCA1.2 | BRCA1.3 | BRCA2.1 | BRCA2.2 | BRCA2.3 | BRCA2.4 |    |
| MCF7                    | ND             | ND    | ND             | ND    | ND             | ND      | ND      | ND      | ND      | ND      | ND      | ND |
| MDA-MB-231              | 2%             | 0%    | 3%             | 0%    | 0%             | 2%      | 2%      | 4%      | 3%      | 0%      | 0%      | 0% |
| MDA-MB-436              | 2%             | 0%    | 0%             | 0%    | 1%             | 2%      | 1%      | 6%      | 2%      | 0%      | 0%      | 0% |
| MDA-MB-468              | 3%             | 0%    | 0%             | 0%    | 0%             | 2%      | 0%      | 4%      | 0%      | 0%      | 0%      | 0% |
| HCC70                   | 1%             | 0%    | 0%             | 6%    | 0%             | 3%      | 0%      | 4%      | 4%      | 1%      | 0%      | 0% |

ND: No DNA available

**Supplementary Table 2.** Clinicopathological characteristics of the human breast cancer cell lines analyzed

| Cell Line Name | BRCA1 Genotype   | TP53 Status | Immunoprofile      | Subtype | Tumour type               |
|----------------|------------------|-------------|--------------------|---------|---------------------------|
| MCF-7          | WT               | WT          | ER+, PgR+/-, HER2- | Luminal | Metastatic adenocarcinoma |
| HCC70          | WT               | c.743G>A    | ER-, PgR-, HER2-   | Basal   | Ductal carcinoma          |
| MDA-MB-231     | WT               | c.839G>A    | ER-, PgR-, HER2-   | Basal   | Metastatic adenocarcinoma |
| MDA-MB-436     | c.5396+1G>A      | c.? *       | ER-, PgR-, HER2-   | Basal   | Adenocarcinoma            |
| MDA-MB-468     | Deletion exon 12 | c.818G>A    | ER-, PgR-, HER2-   | Basal   | Metastatic Adenocarcinoma |

WT, wild-type; ER, estrogen receptor; PgR, progesterone receptor, HER2, human epidermal growth factor receptor 2; \*Breast Cancer Cell line with controversial TP53 status (<http://p53.free.fr/index.html>; <http://cancer.sanger.ac.uk/cosmic>)
